# Supplementary material
Source: MDPI journal article supplement (https://www.mdpi.com/2304-6740/11/6/229)
Supplement: s1 [file s1]

Supporting Information for:

**Ligand tuning in Cu(pyalk)<sub>2</sub> water oxidation  
electrocatalysis**

*Claire C. Cody, Zofia N. Caes, Matt D. Capobianco, Brandon Q. Mercado, Robert H. Crabtree,  
Gary W. Brudvig\**

Department of Chemistry, and Yale Energy Sciences Institute, Yale University, New Haven, CT,  
06520-8107, United States

**TABLE OF CONTENTS**

|                                           |      |
|-------------------------------------------|------|
| Supplementary Figures.....                | S2-6 |
| Crystallographic Refinement Details ..... | S7   |

Supplementary Figures:

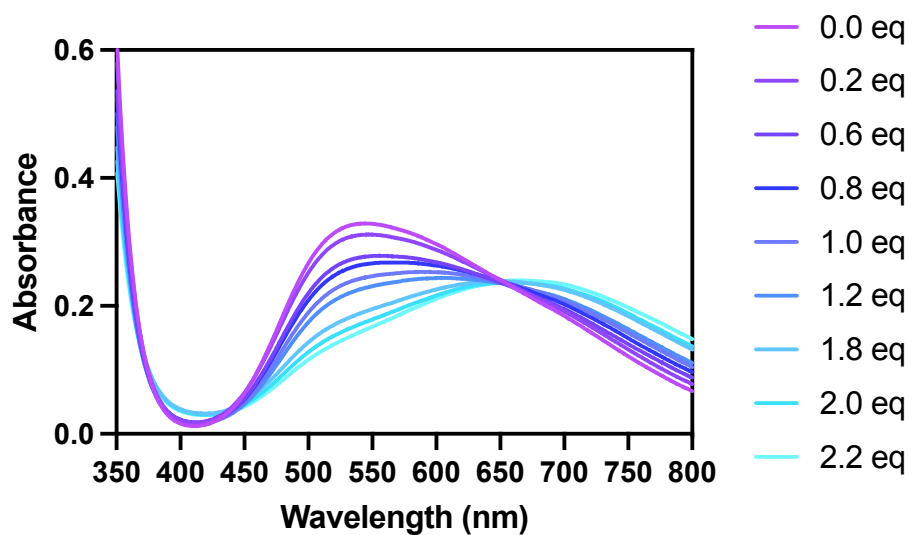

Figure S1. Titration of Cu(pyalk)<sub>2</sub> with HCl.

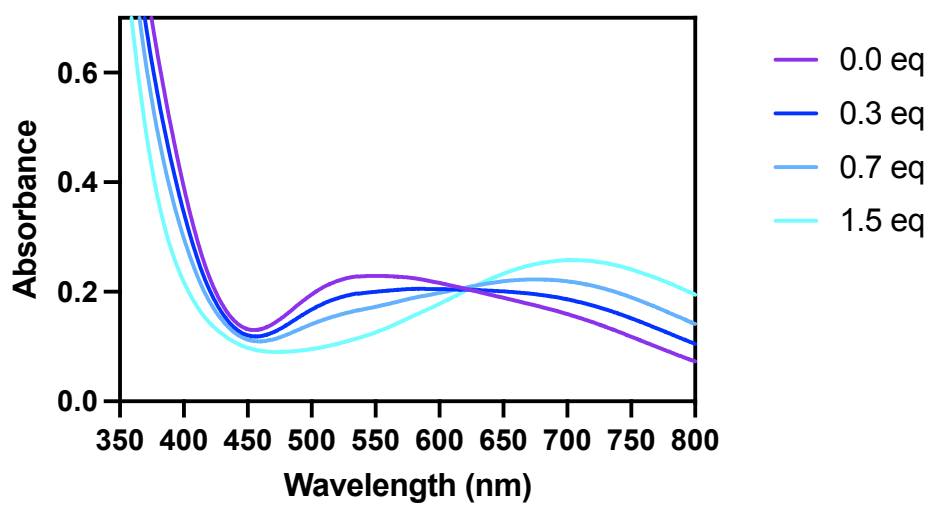

Figure S2. Titration of Cu(4-MeOOCpyalk)<sub>2</sub> with HCl.

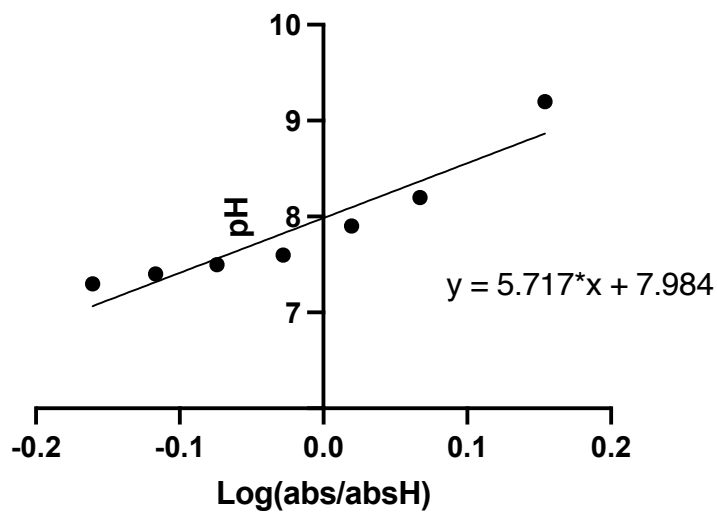

Figure S3. An example of a plot for  $pK_a$  determination. The y-intercept corresponds to the measured  $pK_a$ , as determined from the Henderson-Hasselbach equation.

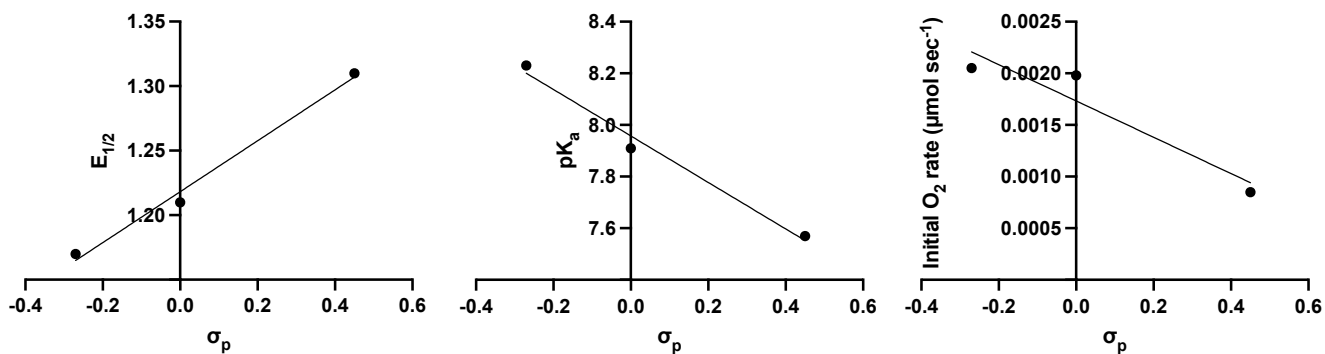

Figure S4. Plots of  $E_{1/2}$ ,  $pK_a$ , and initial rate vs.  $\sigma_p$  Hammett parameters for **1-3**.

$\sigma_p = -0.27$  (-OMe), 0 (-H), 0.45 (-COOMe).

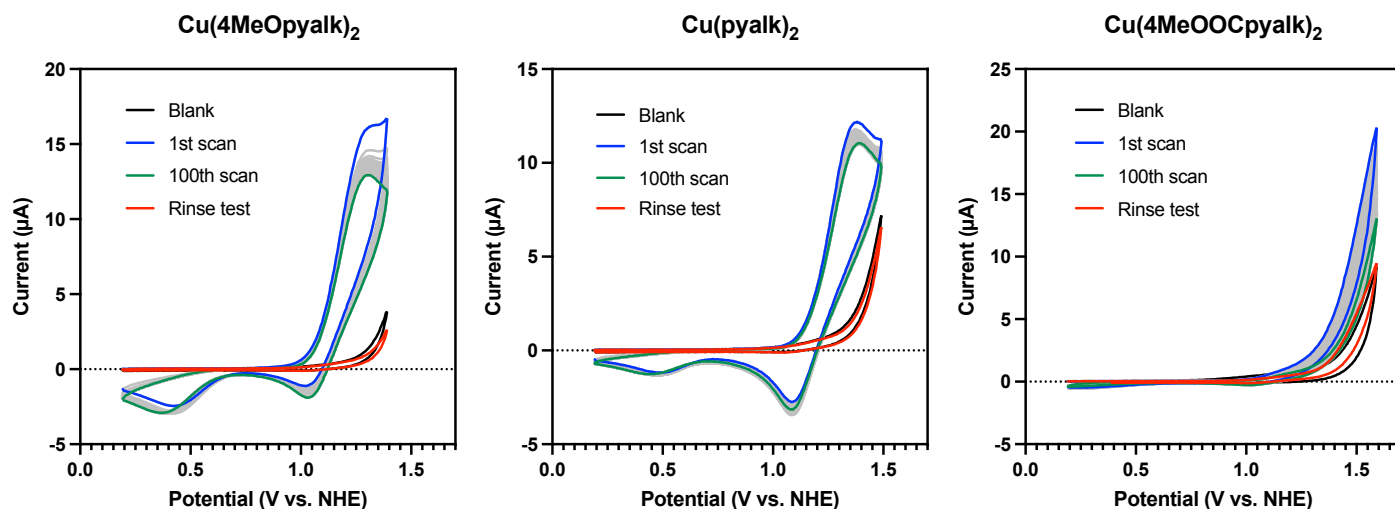

Figure S5. Repeated CVs of **3** (left), **2** (right), and **1** (center), in 0.1 M KNO<sub>3</sub> adjusted to pH 11. BDD working electrode; Pt wire auxiliary electrode; Ag/AgCl (sat'd KCl) reference electrode (0.199 V vs. NHE); scan rate: 100 mV/s. After 100 repeated scans, the electrode was rinsed, not polished, and placed in a fresh electrolyte solution at pH 11 (red trace).

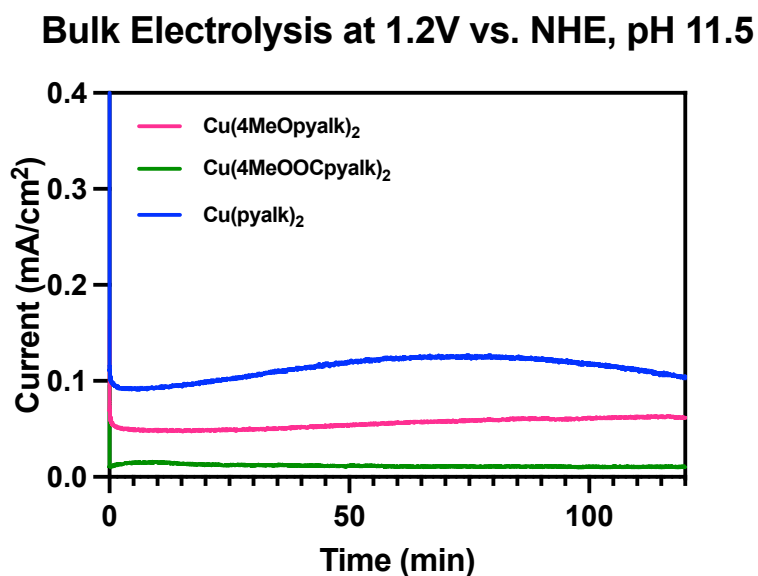

Figure S6. Controlled potential electrolysis at 1.2 V vs. NHE for 2 mM complex in 0.1 M KNO<sub>3</sub> electrolyte, at pH 11.5. Working electrode: 1 cm<sup>2</sup> fluorine-doped tin oxide coated glass, counter electrode: Pt mesh, reference electrode: Ag/AgCl, sat'd KCl.

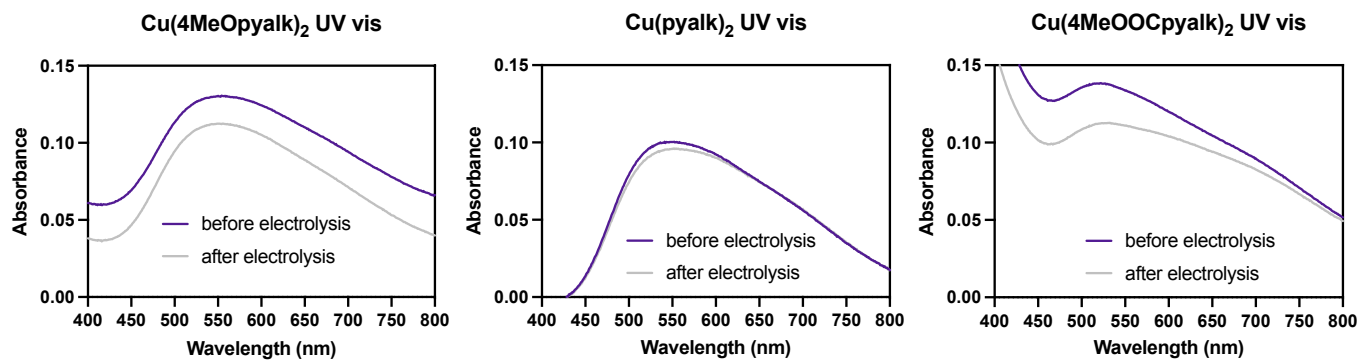

Figure S7. UV-visible spectra before and after controlled potential electrolysis for complexes **1-3**, showing degradation.

| Complex                                    | % degradation (at $\lambda_{\text{max}}$ )<br>after 2 h electrolysis |
|--------------------------------------------|----------------------------------------------------------------------|
| Cu(4-MeOpyalk) <sub>2</sub> ( <b>3</b> )   | 14                                                                   |
| Cu(pyalk) <sub>2</sub> ( <b>1</b> )        | 5                                                                    |
| Cu(4-MeOOCpyalk) <sub>2</sub> ( <b>2</b> ) | 17                                                                   |

Table S1. Percent degradation for complexes **1-3** after 2 hours of bulk electrolysis at 1.2 V vs. NHE, assessed by comparing the absorption at  $\lambda_{\text{max}}$  before and after electrolysis.

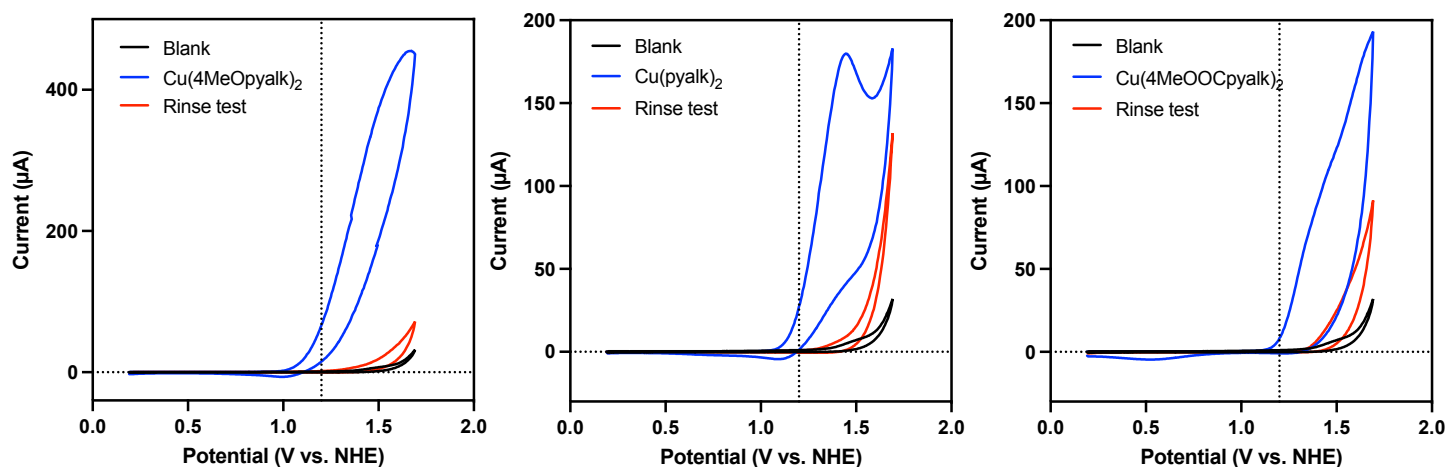

Figure S8. CVs of FTO electrodes after two hours of electrolysis after being rinsed, but not polished, and placed in a fresh solution of 0.1 M KNO<sub>3</sub> adjusted to pH 11. The black trace is a new FTO electrode, the blue trace is a solution of complexes **3** (left), **1** (center), and **2** (right), respectively, and the red trace is the electrode after electrolysis in fresh electrolyte solution. The dotted line indicates the potential of bulk electrolysis. Pt wire auxiliary electrode; Ag/AgCl (sat'd KCl) reference electrode (0.199 V vs. NHE); scan rate: 100 mV/s.

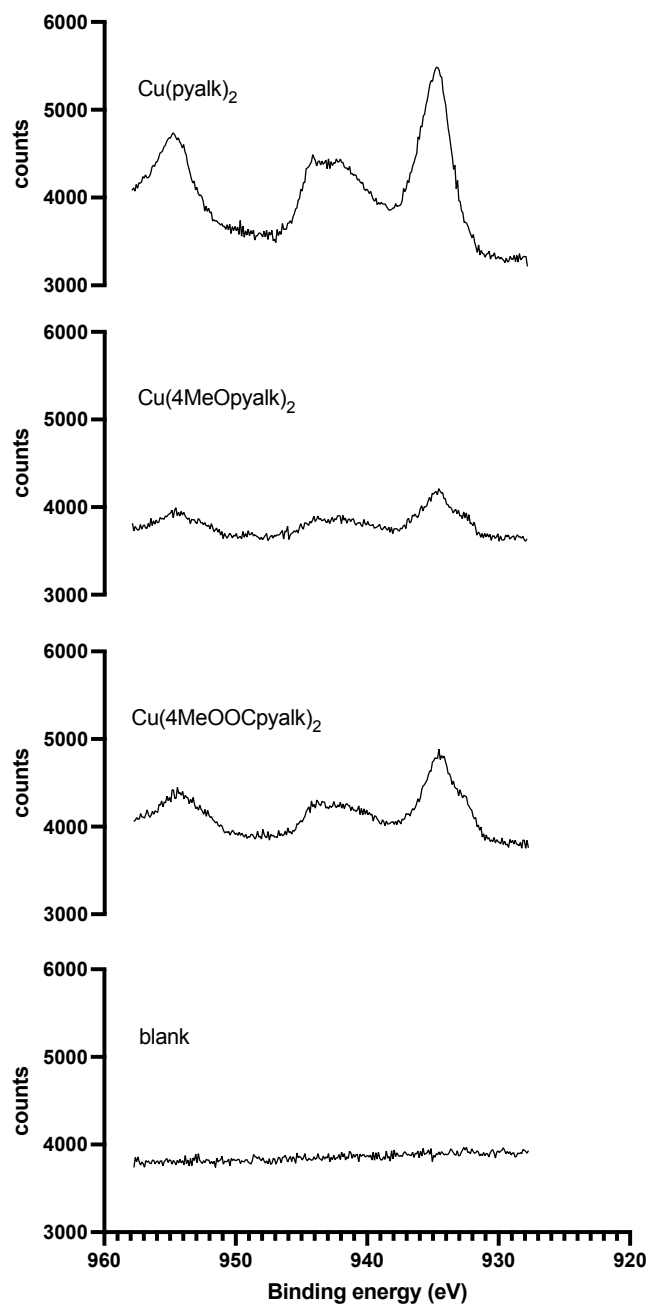

Figure S9. X-ray photoelectron spectroscopy of the FTO electrodes after two hours of electrolysis, showing Cu 2p peaks indicating copper on the surface. The spectra were energy corrected by the adventitious C 1s peak.

## X-ray diffraction refinement details:

Table S2. Crystal data and structure refinement for **2** and **3**.

| Identification code               | 007a-23002 ( <b>2</b> )                                                                                                                         | 007c-20025 ( <b>3</b> )                                                                                                           |
|-----------------------------------|-------------------------------------------------------------------------------------------------------------------------------------------------|-----------------------------------------------------------------------------------------------------------------------------------|
| Empirical formula                 | C <sub>20</sub> H <sub>24</sub> Cu N <sub>2</sub> O <sub>6</sub>                                                                                | C <sub>18</sub> H <sub>24</sub> Cu N <sub>2</sub> O <sub>4</sub>                                                                  |
| Formula weight                    | 451.95                                                                                                                                          | 395.93                                                                                                                            |
| Temperature                       | 93(2) K                                                                                                                                         | 93(2) K                                                                                                                           |
| Wavelength                        | 1.54184 Å                                                                                                                                       | 0.71073 Å                                                                                                                         |
| Crystal system                    | Triclinic                                                                                                                                       | Monoclinic                                                                                                                        |
| Space group                       | P-1                                                                                                                                             | C2/m                                                                                                                              |
| Unit cell dimensions              | a = 6.8532(6) Å<br>b = 7.9673(7) Å<br>c = 9.5580(8) Å<br>$\alpha = 95.023(7)^\circ$<br>$\beta = 109.051(8)^\circ$<br>$\gamma = 91.326(7)^\circ$ | a = 15.8992(3) Å<br>b = 6.9499(2) Å<br>c = 7.9839(2) Å<br>$\alpha = 90^\circ$<br>$\beta = 92.630(2)^\circ$<br>$\gamma = 90^\circ$ |
| Volume                            | 490.66(8) Å <sup>3</sup>                                                                                                                        | 881.27(4) Å <sup>3</sup>                                                                                                          |
| Z                                 | 1                                                                                                                                               | 2                                                                                                                                 |
| Density (calculated)              | 1.530 Mg/m <sup>3</sup>                                                                                                                         | 1.492 Mg/m <sup>3</sup>                                                                                                           |
| Absorption coefficient            | 1.927 mm <sup>-1</sup>                                                                                                                          | 1.264 mm <sup>-1</sup>                                                                                                            |
| F(000)                            | 235                                                                                                                                             | 414                                                                                                                               |
| Crystal size                      | 0.200 x 0.050 x 0.050 mm <sup>3</sup>                                                                                                           | 0.200 x 0.180 x 0.080 mm <sup>3</sup>                                                                                             |
| Crystal color and habit           | Brown Plate                                                                                                                                     | Purple Plate                                                                                                                      |
| Diffractometer                    | Rigaku Saturn 944+ CCD                                                                                                                          | Dectris Pilatus 3R                                                                                                                |
| Theta range for data collection   | 4.920 to 66.880°                                                                                                                                | 3.200 to 28.281°                                                                                                                  |
| Index ranges                      | -8 ≤ h ≤ 8,<br>-9 ≤ k ≤ 9,<br>-11 ≤ l ≤ 11                                                                                                      | -21 ≤ h ≤ 21,<br>-9 ≤ k ≤ 9,<br>-10 ≤ l ≤ 10                                                                                      |
| Reflections collected             | 3484                                                                                                                                            | 11437                                                                                                                             |
| Independent reflections           | 3484 [R(int) = 0.0464]                                                                                                                          | 1187 [R(int) = 0.0201]                                                                                                            |
| Observed reflections (I > 2σ(I))  | 3377                                                                                                                                            | 1181                                                                                                                              |
| Completeness to theta = 66.880°   | 99.0 %                                                                                                                                          | 99.8 %                                                                                                                            |
| Absorption correction             | Semi-empirical from equivalents                                                                                                                 | Semi-empirical from equivalents                                                                                                   |
| Max. and min. transmission        | 1.00000 and 0.75266                                                                                                                             | 1.00000 and 0.80519                                                                                                               |
| Solution method                   | SHELXT-2014/5                                                                                                                                   | SHELXT-2014/5                                                                                                                     |
| Refinement method                 | SHELXL-2014/7                                                                                                                                   | SHELXL-2014/7                                                                                                                     |
| Data / restraints / parameters    | 3484 / 0 / 137                                                                                                                                  | 1187 / 0 / 76                                                                                                                     |
| Goodness-of-fit on F <sup>2</sup> | 1.095                                                                                                                                           | 1.144                                                                                                                             |
| Final R indices [I > 2σ(I)]       | R1 = 0.0367, wR2 = 0.1000                                                                                                                       | R1 = 0.0192, wR2 = 0.0524                                                                                                         |
| R indices (all data)              | R1 = 0.0374, wR2 = 0.1009                                                                                                                       | R1 = 0.0193, wR2 = 0.0525                                                                                                         |
| Largest diff. peak and hole       | 0.584 and -0.396 e.Å <sup>-3</sup>                                                                                                              | 0.412 and -0.297 e.Å <sup>-3</sup>                                                                                                |
